# Supplementary material for: Origin of the enhanced edge optical transition in transition metal dichalcogenide flakes
Source: Royal Society of Chemistry journal article supplement (doi:10.1039/d2tc00078d), 2022-01-01
Supplement: d2tc00078d1.pdf [file d2tc00078d1.pdf]

## Supplementary Information

### Origin of the Enhanced Edge Optical Transition in Transition Metal

#### Dichalcogenide Flakes

Pu Huang,<sup>a</sup> Zhuang Ma,<sup>a</sup> Gui Wang,<sup>a</sup> Wen Xiong,<sup>b</sup> Peng Zhang,<sup>a</sup> Yiling Sun,<sup>a</sup> Zhengfang Qian,<sup>a</sup>  
and Xiuwen Zhang<sup>\*a</sup>

<sup>a</sup>Key Laboratory of Optoelectronic Devices and Systems of Ministry of Education and Guangdong Province, College of Physics and Optoelectronic Engineering, Shenzhen University, Shenzhen, 518060, China

<sup>b</sup>Chongqing Institute of Green and Intelligent Technology, Chinese Academy of Sciences, Chongqing 400714, China

**Keywords:** edge state, optical transition, transition metal dichalcogenides, density functional theory

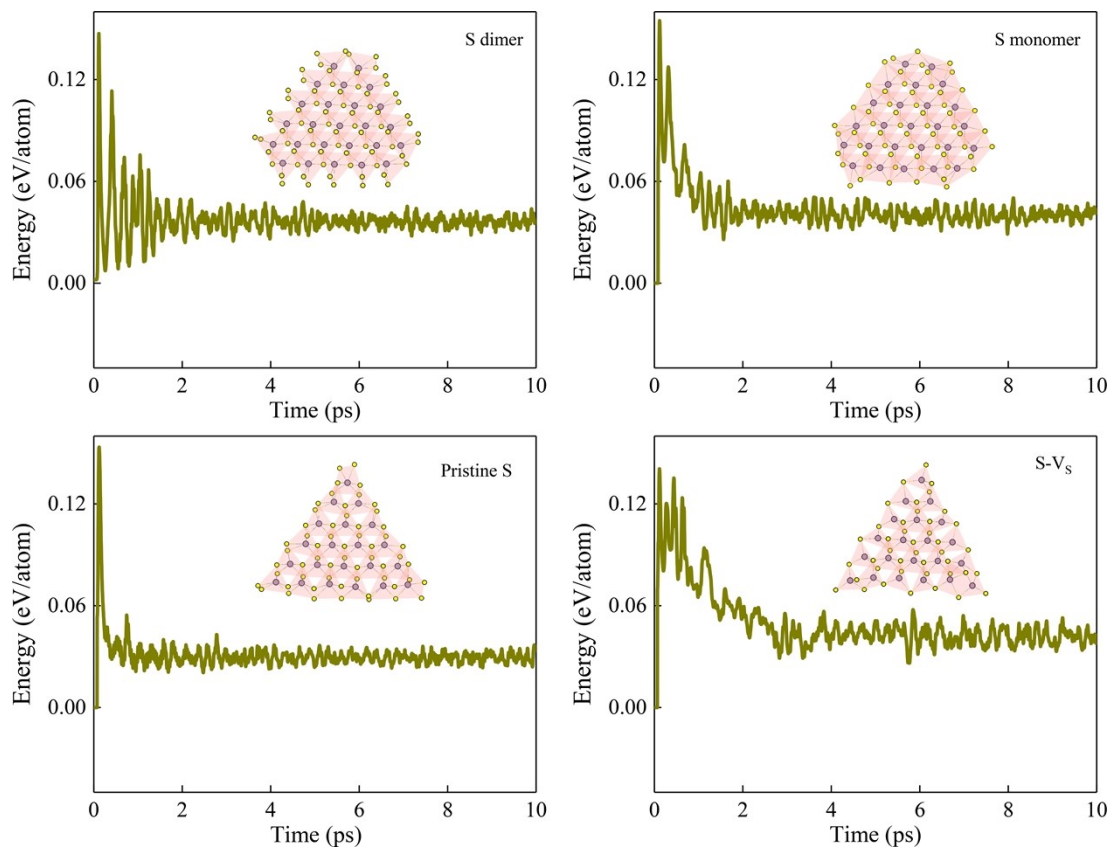

**Fig. S1** AIMD global optimization (0-10 ps) for the triangular MoS<sub>2</sub> flakes with S dimer/monomer, pristine S or S-V<sub>s</sub> edge.

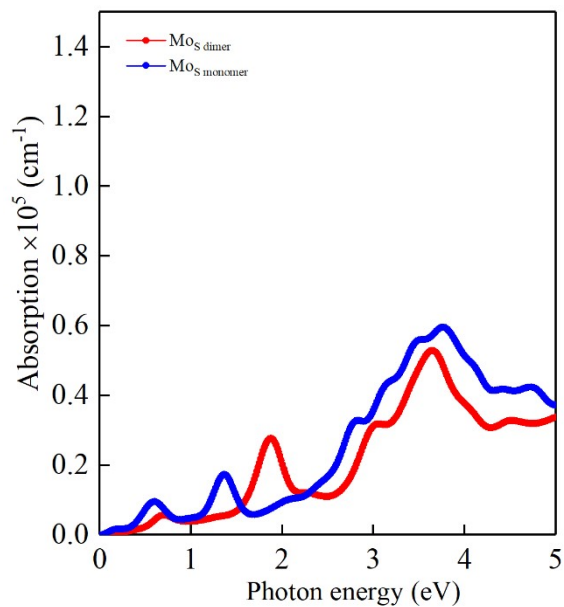

**Fig. S2** Absorption spectrum for truncated triangular (hexagonal) MoS<sub>2</sub> flake with S dimer/monomer at Mo edge (Mo<sub>S</sub> dimer/Mo<sub>S</sub> monomer in **Figure 1c**).

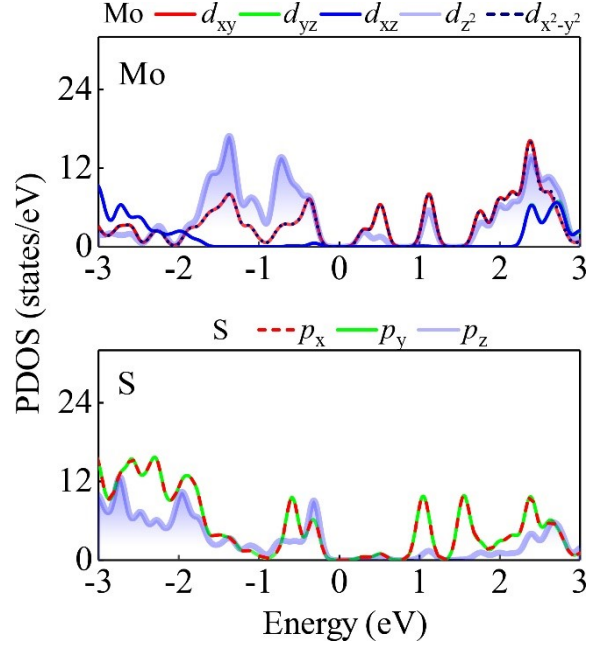

**Fig. S3** PDOS for the  $l=5$  triangular MoS<sub>2</sub> flake with S dimer.

**Table S1.** The TDM intensity for the strong transition  $\psi_{VB}^{281,282,283} \rightarrow \psi_{CB}^{295,296,297}$  in triangular MoS<sub>2</sub> flake with S dimer edge.

| TDM (debye <sup>2</sup> ) | $\psi_{VB}^{281}$ | $\psi_{VB}^{282}$ | $\psi_{VB}^{283}$ |
|---------------------------|-------------------|-------------------|-------------------|
| $\psi_{CB}^{295}$         | 102.503           | 59.551            | 0.001             |
| $\psi_{CB}^{296}$         | 38.465            | 27.876            | 98.194            |
| $\psi_{CB}^{297}$         | 27.827            | 38.218            | 76.227            |

**Table S2.** The TDM intensity for the weak transition  $\psi_{VB}^{286,287,288} \rightarrow \psi_{CB}^{292,293,294}$  in triangular MoS<sub>2</sub> flake with S dimer edge.

| TDM (debye <sup>2</sup> ) | $\psi_{VB}^{286}$ | $\psi_{VB}^{287}$ | $\psi_{VB}^{288}$ |
|---------------------------|-------------------|-------------------|-------------------|
| $\psi_{CB}^{292}$         | 40.121            | 32.498            | 0                 |
| $\psi_{CB}^{293}$         | 6.145             | 7.516             | 28.943            |
| $\psi_{CB}^{294}$         | 7.523             | 6.13              | 29.776            |

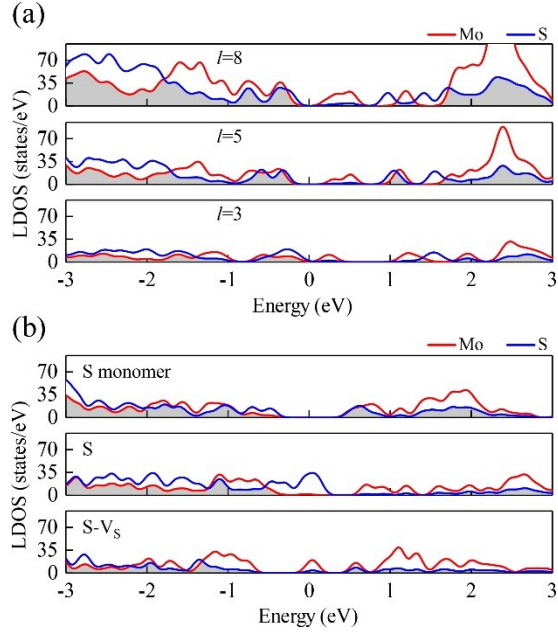

**Fig. S4** (a) Overlapped  $p$ - $d$  orbital of LDOS for the triangular MoS<sub>2</sub> flake with S dimer as a function of the size  $l$ . (b) LDOS for  $l=5$  triangular MoS<sub>2</sub> flake with other edges (S monomer, pristine S and reconstructed S-V<sub>s</sub> configurations).

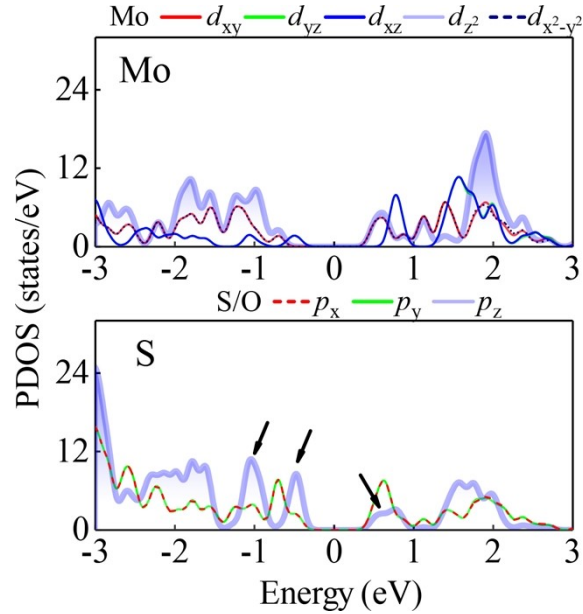

**Fig. S5** PDOS for the  $l=5$  triangular MoS<sub>2</sub> flake with S monomer.

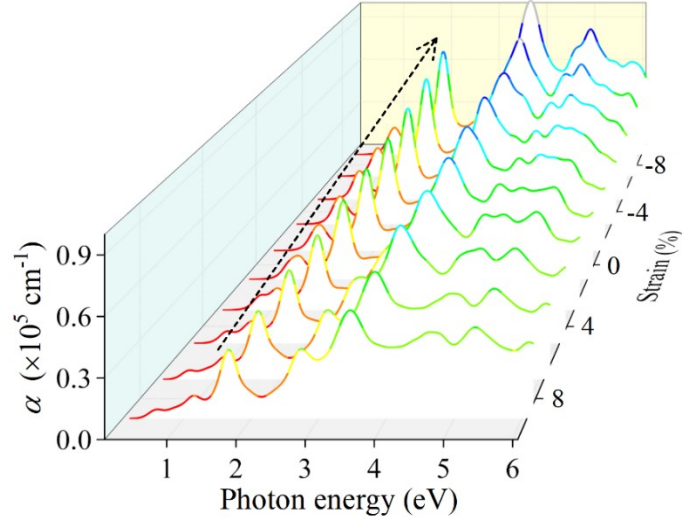

**Fig. S6** In-plane strain engineering of the enhanced transition state for  $l=5$  triangular  $\text{MoS}_2$  flake.

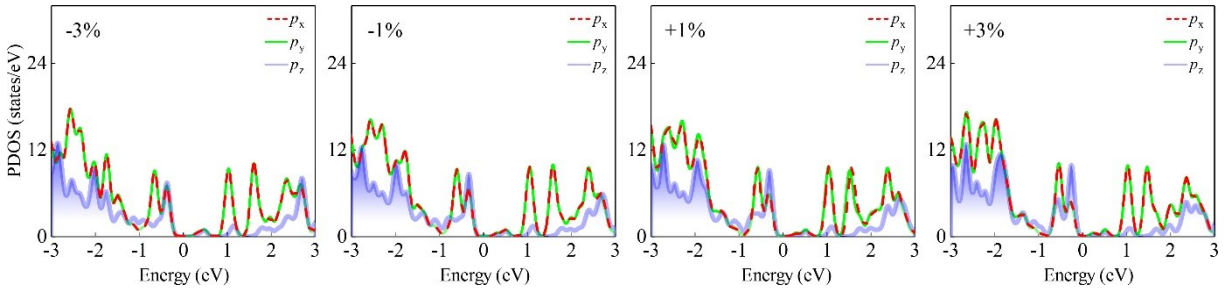

**Fig. S7** PDOS for the compressive and tensile in-plane strained triangular  $\text{MoS}_2$  flake, indicating the gradually enhanced band-edge  $p_z$  component for the tensile strain case.

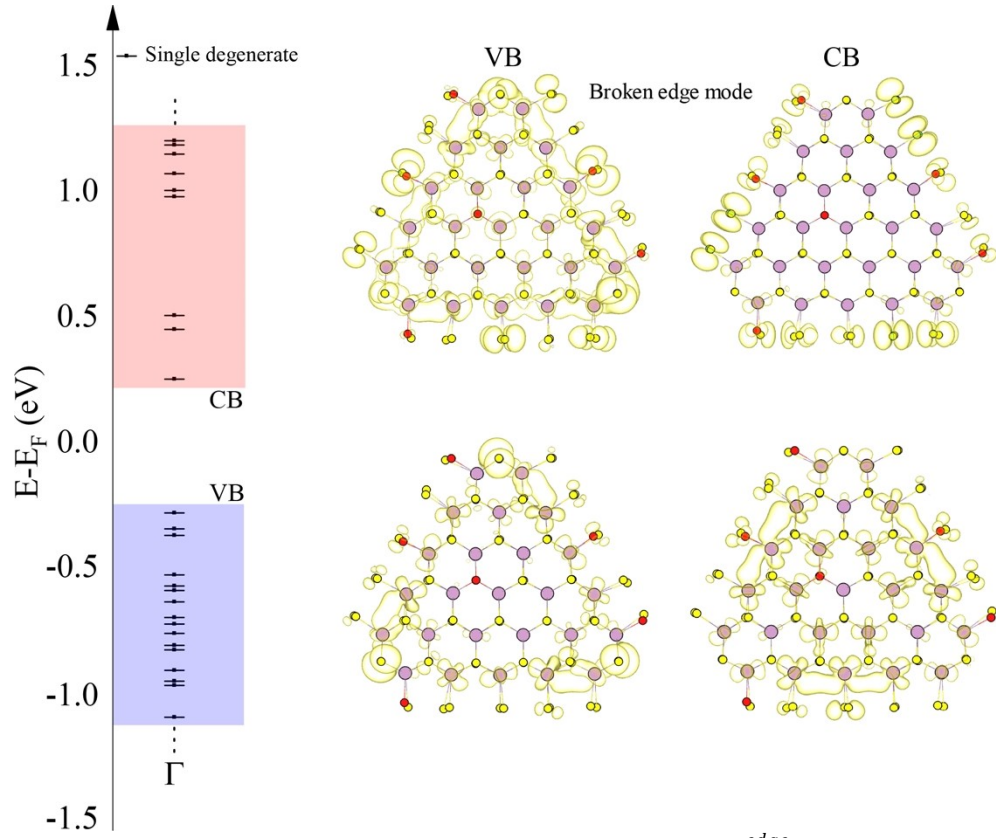

**Fig. S8** Discrete level diagram for  $l=5$  triangular MoS<sub>2</sub> flake with  $O_s^{edge}$  and the wavefunctions for edge states ( $\rho = 2 \times 10^{-3} \text{ e\AA}^{-3}$ ).
